# Supplementary material
Source: publisher figshare collection journal article supplement (https://tandf.figshare.com/ndownloader/files/17819852)

## Supplementary Information

### Legend to Supplementary Figures

**Figure S1a:** Ramachandran plot of PH0702.

**Figure S2b:** PROSA results of PH0702 modeled protein (Fig b) and Template 2YRF (Fig a)

**Figure S2:** RMSD (A) and RMSF (B) of PH0702 protein ligand complex during the MD simulation period of 30 ns.

**Figure S3:** Distribution of HOMO (A to E) and LUMO (F to J) of the five top compounds.

**Figure S4:** Distribution of MESP profile of top five compounds.

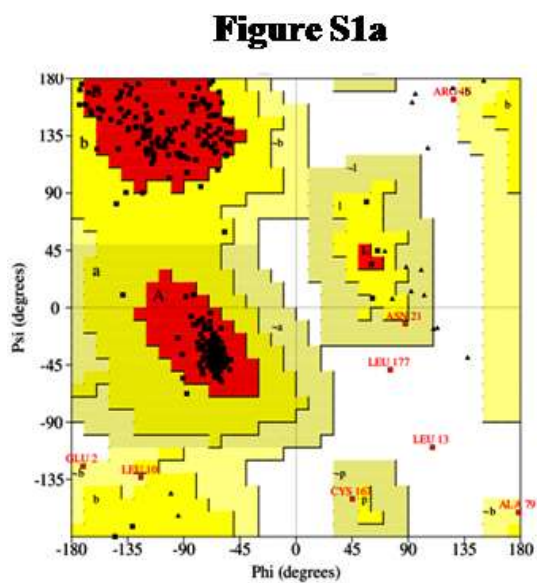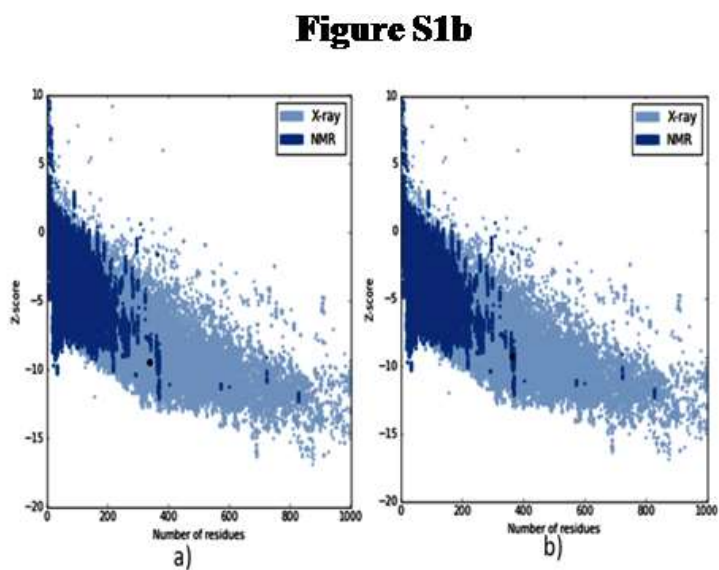

Figure S2

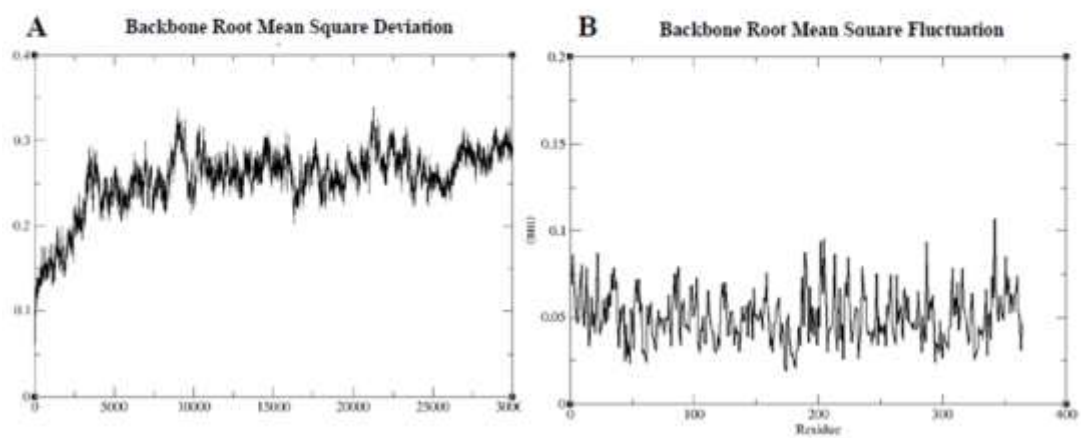

Figure S3

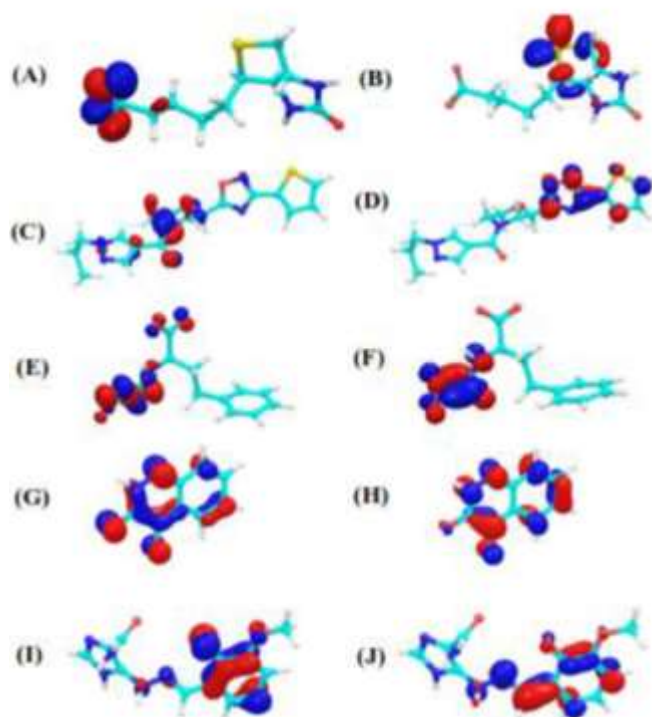

Figure S4

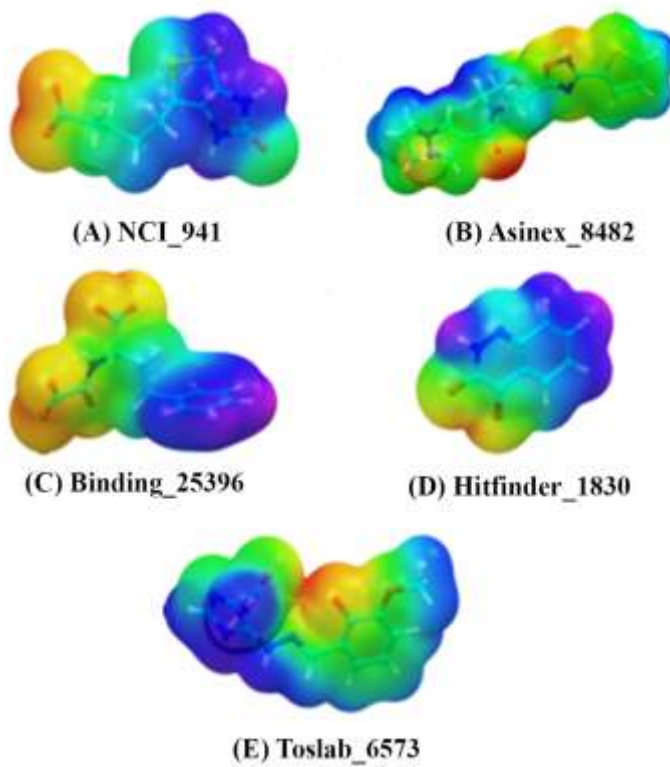

Supplement: Supplementary file 1 [file 17819852]
